# Supplementary material for: Preparation and luminescence properties of core–shell structure composites SiO2@ANA-Si–Eu and SiO2@ANA-Si–Eu–L and core–shell–shell structure composites SiO2@ANA-Si–Eu@SiO2 and SiO2@ANA-Si–Eu–L@SiO2
Source: Royal Society of Chemistry journal article supplement (doi:10.1039/c9nj05499e), 2020-01-01
Supplement: c9nj05499e1.pdf [file c9nj05499e1.pdf]

## Supporting Information

### Preparation and Luminescence Properties of core-shell structure composites $\text{SiO}_2@ANA\text{-Si-Eu}$ , $\text{SiO}_2@ANA\text{-Si-Eu-L}$ and core-shell-shell structure composites $\text{SiO}_2@ANA\text{-Si-Eu}@SiO_2$ , $\text{SiO}_2@ANA\text{-Si-Eu-L}@SiO_2$

Yan Qiao <sup>a</sup>, Yilian Li <sup>a</sup>, Wenxian Li <sup>\*a</sup>, Jinrong Bao <sup>a</sup>, Yushan Zheng <sup>b</sup>, Lina Feng <sup>a</sup>, Yangyang Ma <sup>a</sup>, Kuisuo Yang <sup>a</sup>, Anping Wu <sup>a</sup>, He Bai <sup>a</sup> and Yunjiang Yang <sup>a</sup>

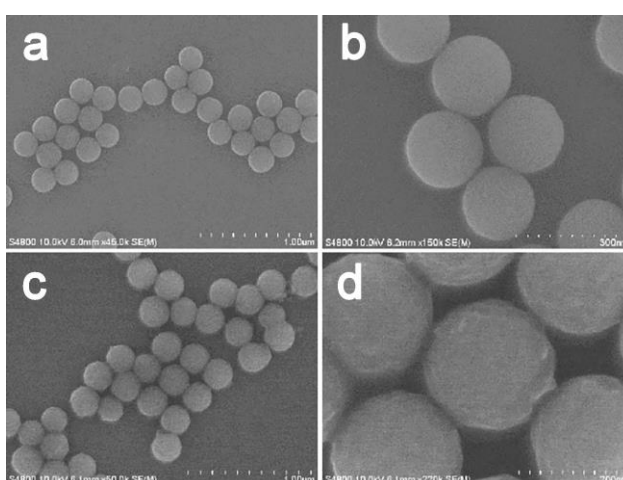

Fig. S1 The SEM photographs of (a, b)  $\text{SiO}_2$  and (c, d)  $\text{SiO}_2@ANA\text{-Si}$ .

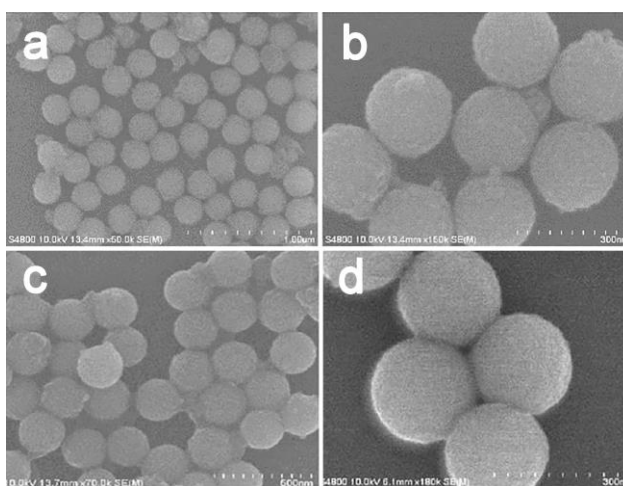

Fig. S2 The SEM Photographs of (a, b)  $\text{SiO}_2@ANA\text{-Si-Eu}$  and (c, d)  $\text{SiO}_2@ANA\text{-Si-Eu-phen}$ .

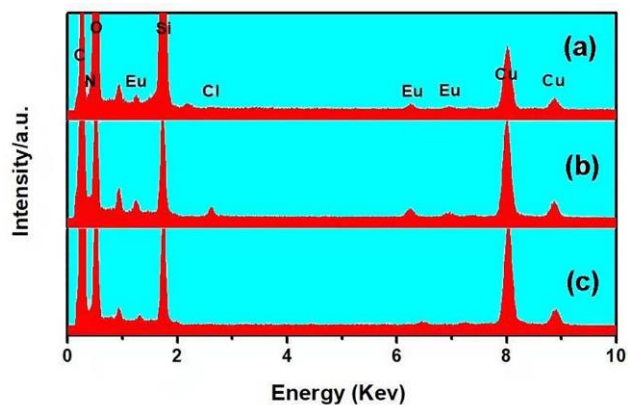

|     |           | N     | O     | Si    | Cl   | Eu   |
|-----|-----------|-------|-------|-------|------|------|
| (a) | Weight(%) | 7.71  | 54.65 | 32.26 | 2.21 | 3.17 |
|     | Atomic(%) | 10.78 | 65.34 | 22.67 | 0.90 | 0.31 |
| (b) | Weight(%) | 5.22  | 56.21 | 35.79 | 1.15 | 1.63 |
|     | Atomic(%) | 6.01  | 68.74 | 24.43 | 0.62 | 0.20 |
| (c) | Weight(%) | 7.79  | 49.24 | 28.98 | 5.88 | 8.11 |
|     | Atomic(%) | 9.47  | 62.78 | 24.13 | 2.70 | 0.92 |

Fig. S3 The EDX of (a) SiO<sub>2</sub>@ANA-Si-Eu, (b) SiO<sub>2</sub>@ANA-Si-Eu-phen, (c) SiO<sub>2</sub>@ANA-Si-Eu-TTA.

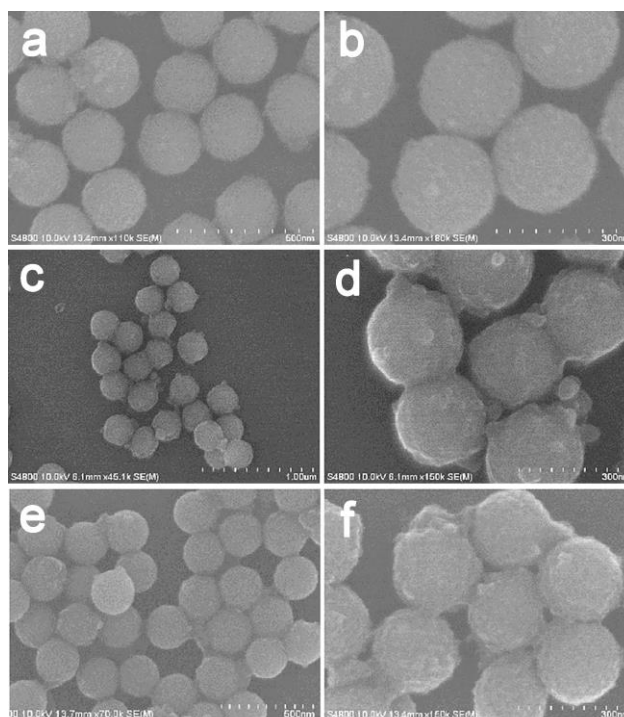

Fig. S4 The SEM Photographs of (a, b) SiO<sub>2</sub>@ANA-Si-Eu@SiO<sub>2</sub>, (c, d) SiO<sub>2</sub>@ANA-Si-Eu-phen@SiO<sub>2</sub>, (e, f) SiO<sub>2</sub>@ANA-Si-Eu-TTA@SiO<sub>2</sub>.

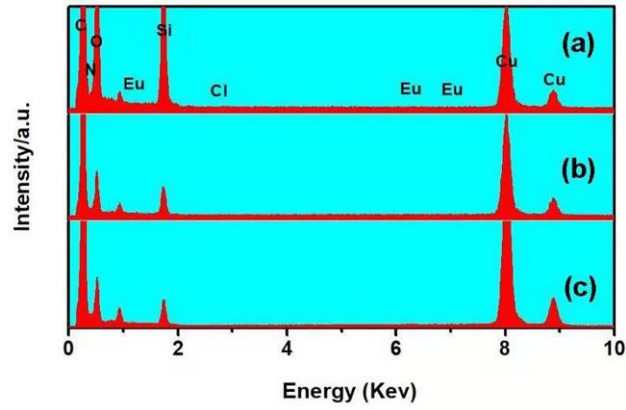

|     |           | N    | O     | Si    | Cl   | Eu   |
|-----|-----------|------|-------|-------|------|------|
| (a) | Weight(%) | 2.36 | 58.70 | 38.17 | 0.33 | 0.44 |
|     | Atomic(%) | 3.54 | 70.25 | 26.02 | 0.14 | 0.05 |
| (b) | Weight(%) | 3.57 | 57.95 | 37.57 | 0.37 | 0.54 |
|     | Atomic(%) | 5.23 | 69.23 | 25.32 | 0.16 | 0.06 |
| (c) | Weight(%) | 8.96 | 52.36 | 37.52 | 0.47 | 0.69 |
|     | Atomic(%) | 6.86 | 64.69 | 28.23 | 0.17 | 0.05 |

Fig. S5 The EDX of (a)  $\text{SiO}_2\text{@ANA-Si-Eu@SiO}_2$ , (b)  $\text{SiO}_2\text{@ANA-Si-Eu-phen@SiO}_2$ , (c)  $\text{SiO}_2\text{@ANA-Si-Eu-TTA@SiO}_2$ .

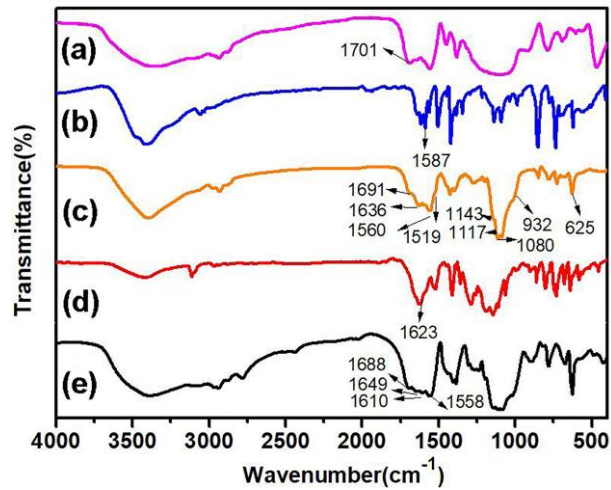

Fig. S6 The FT-IR spectra of (a)  $\text{SiO}_2\text{@ANA-Si}$ , (b) phen, (c)  $\text{SiO}_2\text{@ANA-Si-Eu-phen}$ , (d) TTA, (e)  $\text{SiO}_2\text{@ANA-Si-Eu-TTA}$ .

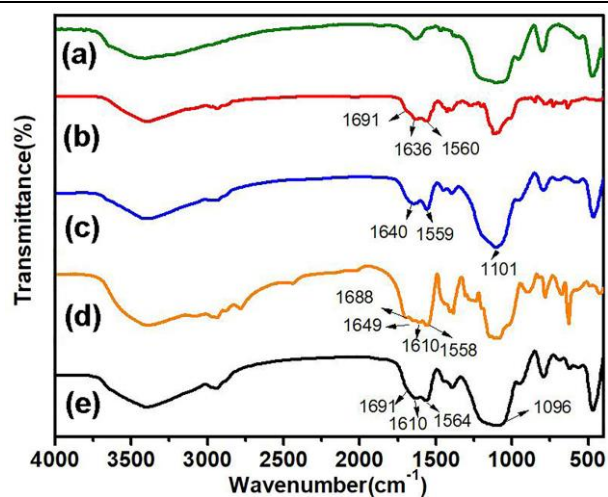

**Fig. S7** The FT-IR spectra of (a) SiO<sub>2</sub>, (b) SiO<sub>2</sub>@ANA-Si-Eu-phen, (c) SiO<sub>2</sub>@ANA-Si-Eu-phen@SiO<sub>2</sub>, (d) SiO<sub>2</sub>@ANA-Si-Eu-TTA, (e) SiO<sub>2</sub>@ANA-Si-Eu-TTA@SiO<sub>2</sub>.
